# Supplementary material
Source: PubMed Central journal article supplement (PMC4512876)
Supplement: NIHMS692018-supplement-Appendix.pdf [file NIHMS692018-supplement-Appendix.pdf]

SUPPLEMENTAL MATERIAL

Appendix

Search strategy used to identify ASCVD and HF CPM

| Steps    | Search Terms                                                                                                                                                                                                                                                                                                                                               | Number of Hits |
|----------|------------------------------------------------------------------------------------------------------------------------------------------------------------------------------------------------------------------------------------------------------------------------------------------------------------------------------------------------------------|----------------|
| 1        | ((predict\$ adj1 model\$) or (predict\$ adj1 instrument\$) or (predict\$ adj1 score\$) or (predict\$ adj1 index)).mp.                                                                                                                                                                                                                                      | 29379          |
| 2        | ((prognos\$ adj1 model\$) or (prognos\$ adj1 instrument\$) or (prognos\$ adj1 score\$) or (prognos\$ adj1 index)).mp.                                                                                                                                                                                                                                      | 5351           |
| 3        | ((risk adj1 model\$) or (risk adj1 instrument\$) or (risk adj1 score\$) or (risk adj1 index) or (risk assessment model or risk assessment instrument or risk assessment score)).mp.                                                                                                                                                                        | 9714           |
| 4        | atrial fib\$.mp. or exp Atrial Fibrillation/ or exp coronary artery disease/ or exp coronary disease/ or exp myocardial infarction/ or Myocardial infarct\$.mp. or exp Heart Failure, Congestive/ or exp myocardial ischemia/ or exp cardiovascular diseases/ or exp Cerebrovascular Accident/ or *heart failure/ or *stroke/ or *acute coronary syndrome/ | 1727747        |
| 5        | 1 or 2 or 3                                                                                                                                                                                                                                                                                                                                                | 43148          |
| 6        | 4 and 5                                                                                                                                                                                                                                                                                                                                                    | 6052           |
| <b>7</b> | <b>limit 6 to yr="1990 -Current"</b><br><b>**Where current = May 15, 2012 publications</b>                                                                                                                                                                                                                                                                 | <b>5720</b>    |
